# Supplementary material for: Multifactorial White Matter Damage in the Acute Phase and Pre-Existing Conditions May Drive Cognitive Dysfunction after SARS-CoV-2 Infection: Neuropathology-Based Evidence
Source: MDPI journal article supplement (doi:10.3390/v15040908), 2023-03-31
Supplement: s1 [file s1]

**Supplementary Table S1:** Antibodies used for immunohistochemistry

| Antibody            | Clone                  | Company                                               | Dilution | positive control                                           |
|---------------------|------------------------|-------------------------------------------------------|----------|------------------------------------------------------------|
| CD8                 | clone C8/144B          | DAKO, Glostrup, Denmark                               | 1:100    | lymph node                                                 |
| CD20                | clone L26              | DAKO, Glostrup, Denmark                               | 1:400    | lymph node                                                 |
| HLA-DR              | clone CR3/43           | DAKO, Glostrup, Denmark                               | 1:400    | brain infarction, ischaemic, postmortem brain tissue       |
| $\beta$ A4          | clone 6F/3D            | DAKO, Glostrup, Denmark                               | 1:100    | Alzheimer's disease postmortem brain tissue                |
| AT8                 | clone AT8, pS202/pT205 | Thermo Scientific, Rockford, IL, USA                  | 1:200    | Alzheimer's disease postmortem brain tissue                |
| $\alpha$ -synuclein | clone 5G4              | Roboscreen, Leipzig, Germany                          | 1:4,000  | Parkinson's disease postmortem brain tissue                |
| pTDP43              | clone 11-9, pS409/410  | Cosmo Bio, Tokyo, Japan                               | 1:20,000 | Fronto-temporal lobar degeneration postmortem brain tissue |
| p62                 | clone 3/p62 lck ligand | BD Transduction Laboratories, Franklin Lakes, NJ, USA | 1:500    | Alzheimer's disease postmortem brain tissue                |
| MBP                 | clone BS188            | Nordic BioSite AB, Täby, Sweden                       | 1:200    | control white matter postmortem brain tissue               |
| Myosin slow         | WB-MHCs                | Novocastra, Leica Microsystems, Deer Park, IL, USA    | 1:50     | muscle, quadriceps                                         |
| Myosin fast         | WB-MHCf                | Novocastra, Leica Microsystems, Deer Park, IL, USA    | 1:50     | muscle, quadriceps                                         |
| SARS-COV2           | rb Spike; ms N-protein | Sinobiological, Beijing, China                        | 1:1000   | postmortem lung of COVID19 pneumonia                       |
